# Supplementary material for: A combined test for feature selection on sparse metaproteomics data—an alternative to missing value imputation
Source: PeerJ journal article supplement (doi:10.7717/peerj.13525), 2022-06-24
Supplement: SupplementaryMaterials_staff_KT.pdf [file SupplementaryMaterials_staff_KT.pdf]

# A combined test for feature selection on sparse metaproteomics data - an alternative to missing value imputation

S. Placade, M. Berland, M. Blein-Nicolas, O. Langella, A. Bassignani, C. Juste

## 1 Permutation procedure for the combined test

### Preliminary: define the permutation design

According to the study design, the user can provide constraints on the permutations *via* control parameters defined by the function `how` to be passed to the R function `shuffle` (`permute` package). For the *ProteoCardis* datasets, no constraints were considered, but for *Pigs*, classes were permuted while keeping together the samples from the same animal.

### Permutation test $p$ -values

Let  $n$  be the number of biological samples in the dataset, and  $m$  the number of proteins. Let  $(a_j)_{j=1,\dots,m}$  be the number of non-missing intensities among the  $n$  samples for each protein  $j = 1, \dots, m$ . After filtering of proteins with less than  $\tau$  non-missing values,  $a_j \in \{\tau, \dots, n\}$  for all  $j$ . Then, for each  $a \in \{\tau, \dots, n\}$ ,

- Let  $\mathcal{C}_a$  be the set of proteins with  $a$  non-missing values.
- For each protein  $j \in \mathcal{C}_a$ , classes are permuted repeatedly according to the chosen permutation design, for repetitions  $r = 1, \dots, \lfloor N^{perm} / \#\mathcal{C}_a \rfloor$  with  $\lfloor \cdot \rfloor$  the integer part and  $\#$  the cardinal, and the Fisher combined statistic  $S_{j,r}^a$  is computed.
- The vector  $(S_{j,r}^a)_{j \in \mathcal{C}_a, r=1, \dots, \lfloor N^{perm} / \#\mathcal{C}_a \rfloor}$  represents a sample of the distribution of the test statistic under the null hypothesis of no class effect, for proteins with  $a$  non-missing values.

Then, for each protein  $j = 1, \dots, m$ , the  $p$ -value of the combined test is equal to:

$$p_j = \frac{1}{\#\mathcal{C}_{a_j} \times \lfloor N^{perm} / \#\mathcal{C}_{a_j} \rfloor} \sum_{j \in \mathcal{C}_{a_j}} \sum_{r=1}^{\lfloor N^{perm} / \#\mathcal{C}_{a_j} \rfloor} \mathbb{I}_{S_j > S_{j,r}^{a_j}} \quad (\text{s1})$$

with  $S_j$  the Fisher combined statistics of protein  $j$  computed with the true classes.

### Resampling based FDR

Resampling-based FDR is computed for 100 permutations. For  $s = 1, \dots, 100$ ,

- Classes are permuted according to the chosen permutation design.
- The Fisher combined statistic  $(\tilde{S}_j^s)_{j=1,\dots,m}$  is computed, using the same permuted classes for all proteins.
- The vector  $(p_j^{perm,s})_{j=1,\dots,m}$  of  $p$ -values under the complete null assumptions are computed by equation (s1) with  $S_j$  replaced by  $\tilde{S}_j^s$ . Note that the distribution under the null assumption does not require to be computed again.

Following the procedure by Reiner et al. (2003), new estimates of the  $p$ -values are computed assuming that the marginal distributions under the complete null hypothesis are exchangeable:

$$p_j^{FDR} = \frac{1}{100m + 1} \left( \sum_{\ell=1}^m \sum_{s=1}^{100} \mathbb{I}_{p_\ell^{perm,s} \leq p_j} + 1 \right)$$

Finally, FDR adjustment (Benjamini and Hochberg, 1995) is applied to  $(p_j^{FDR})_{j=1,\dots,m}$ .

## 2 Simulation framework

### General procedure

- Protein intensities from the data set *ProteoCardis-cyto* were filtered at threshold 10 (i.e. proteins with less than 10 non-missing values were removed), resulting in 11,433 proteins and 74% of missing values. Then the missing values were imputed by kNN, providing a realistic metaproteomic data set.
- Two classes of size 49 and 50 were randomly sampled among the 99 samples.
- 2000 proteins were randomly selected to be different between the two classes. Two types of difference were considered: (i) Differential intensity, (ii) Differential presence (see details below).
- Two missingness scenarios were considered: (i) MAR: Missing values were drawn randomly such that the proportion of missing values on the total data set is equal to the proportion in the original data set *Proteocardis-cyto* after filtering at level 10; (ii) MNAR: a hard thresholding was applied, with threshold chosen to have the same proportion of missing values than on *ProteoCardis-cyto* after filtering at level 10.
- For the  $2 \times 2$  scenarios, proteins with less than 20 non-missing values were removed, then the three FSMs SVD-lmm, single-lmm and the combined test were implemented, and the ROC curves were computed. Note that KNN-lmm was not considered since it includes the same imputation method used to generate the data set; Besides, this method has been shown to perform similarly to SVD-lmm.

### Generate difference between groups

- **Differential intensity.** For each of the 2000 proteins, the quantity  $FC_j/2$  was added to the intensities of samples from one class and subtracted to the intensities of samples from the other class. The fold change  $FC_j$  was tuned so that the corresponding  $p$ -value of a t-test was approximately equal to  $\alpha = 10^{-3}$ , according to the standard deviation  $\sigma_j$  of the intensities of each protein. More precisely, for a fold-change  $FC_j$ , the t-test statistic is equal to

$$S = \frac{FC_j}{\sqrt{\sigma_j^2/50 + \sigma_j^2/49}} \simeq \frac{5FC_j}{\sigma}$$

Thus, setting the  $p$ -value to  $\alpha$  is equivalent to:

$$1 - F_{st}(S, df = 97) = \alpha \quad \Rightarrow \quad FC_j \simeq \frac{\sigma}{5} G_{st}(1 - \alpha, df = 97)$$

where  $F_{st}$  and  $G_{st}$  denote the cumulative distribution function and the quantile function of the student distribution.

- **Differential presence.** For each of the 2000 proteins, each intensity was set to NA with probability  $\tau$  in one class and  $1 - \tau$  in the other class. The parameter  $\tau$  was tuned such that the  $p$ -value of the Fisher exact test for the average table:

|         | Present                       | Absent                        |
|---------|-------------------------------|-------------------------------|
| Class 1 | $\lfloor 50\tau \rfloor$      | $50 - \lfloor 50\tau \rfloor$ |
| Class2  | $49 - \lfloor 49\tau \rfloor$ | $\lfloor 49\tau \rfloor$      |

was equal to  $\alpha = 10^{-3}$ , where  $\lfloor \cdot \rfloor$  denotes the integer part.

### 3 Supplementary figures and tables

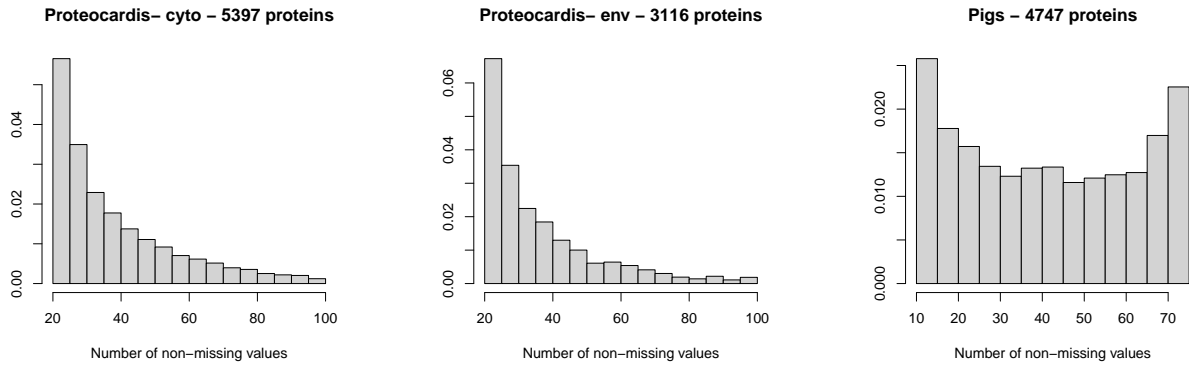

|          | Proteocardis-cyto |         |            |         |        | Proteocardis-env |         |            |         |        |
|----------|-------------------|---------|------------|---------|--------|------------------|---------|------------|---------|--------|
|          | Combined          | KNN-lmm | Single-lmm | SVD-lmm | Hurdle | Combined         | KNN-lmm | Single-lmm | SVD-lmm | Hurdle |
| q < 0.01 | 0                 | 2       | 3          | 2       | 2      | 5                | 0       | 9          | 1       | 1      |
| q < 0.05 | 6                 | 2       | 27         | 3       | 15     | 13               | 5       | 17         | 2       | 29     |
| q < 0.1  | 25                | 2       | 67         | 5       | 38     | 55               | 18      | 35         | 4       | 47     |
| q < 0.2  | 92                | 5       | 223        | 23      | 125    | 113              | 82      | 80         | 6       | 118    |

  

|          | Pigs     |         |            |         |        |
|----------|----------|---------|------------|---------|--------|
|          | Combined | KNN-lmm | Single-lmm | SVD-lmm | Hurdle |
| q < 0.01 | 1100     | 1205    | 1108       | 1310    | 914    |
| q < 0.05 | 1831     | 1772    | 1754       | 1906    | 1669   |
| q < 0.1  | 2289     | 2114    | 2176       | 2264    | 2125   |
| q < 0.2  | 2867     | 2613    | 2666       | 2711    | 2605   |

Figure S1: **Statistical characteristics of the three data sets** *ProteoCardis-cyt*, *Proteocardis-env*, *Pigs*. Top: frequencies of the number of non-missing values for all proteins after filtering (threshold 20 for *ProteoCardis*, and 10 for *Pigs*). Bottom: number of selected variables with the resampling FDR procedure with 100 resampling repetitions, with various values of the FDR threshold values.

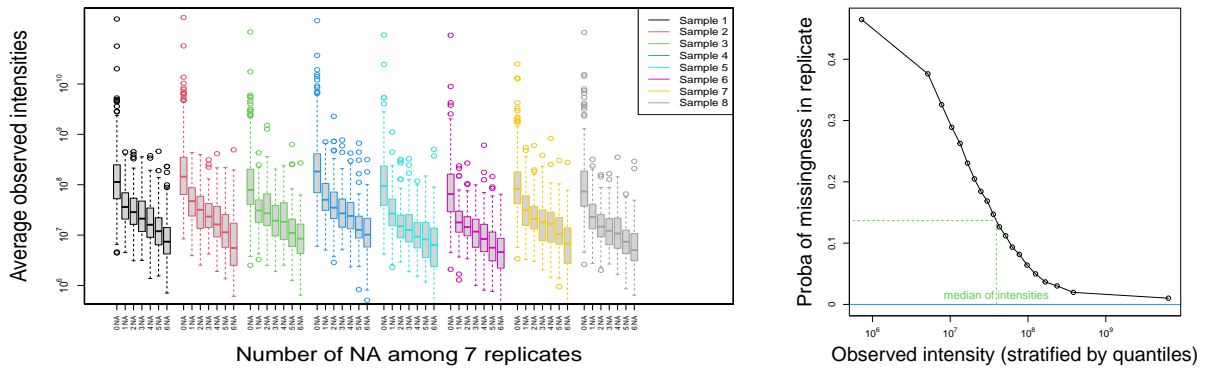

Figure S2: **Analysis of replicates - envelope fraction** Left: log10-transformed average intensities of non-missing observations, as a function of the number of missing values, for all proteins and for each biological sample. Right: Estimate of the probability that a protein is missing in a technical replicate as a function of the average of its non-missing values.

### ProteoCardis-env

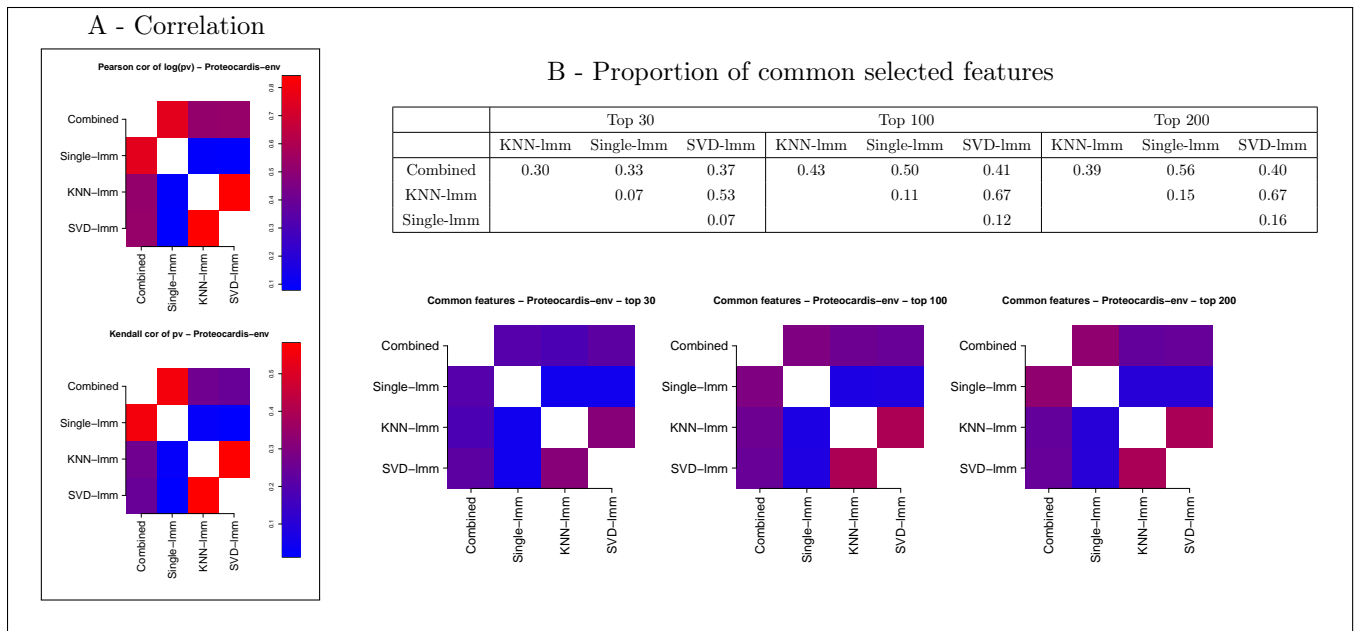

Figure S3: **Pairwise agreement between  $p$ -values of FSMs for *ProteoCardis-env*.** A: Pearson correlation between log of  $p$ -values and Kendall correlation between  $p$ -values. B: Proportion of common features among the top  $N$  ( $N = 30, 100, 200$ ) for each pair of FSMs, as a table and a heatmap.

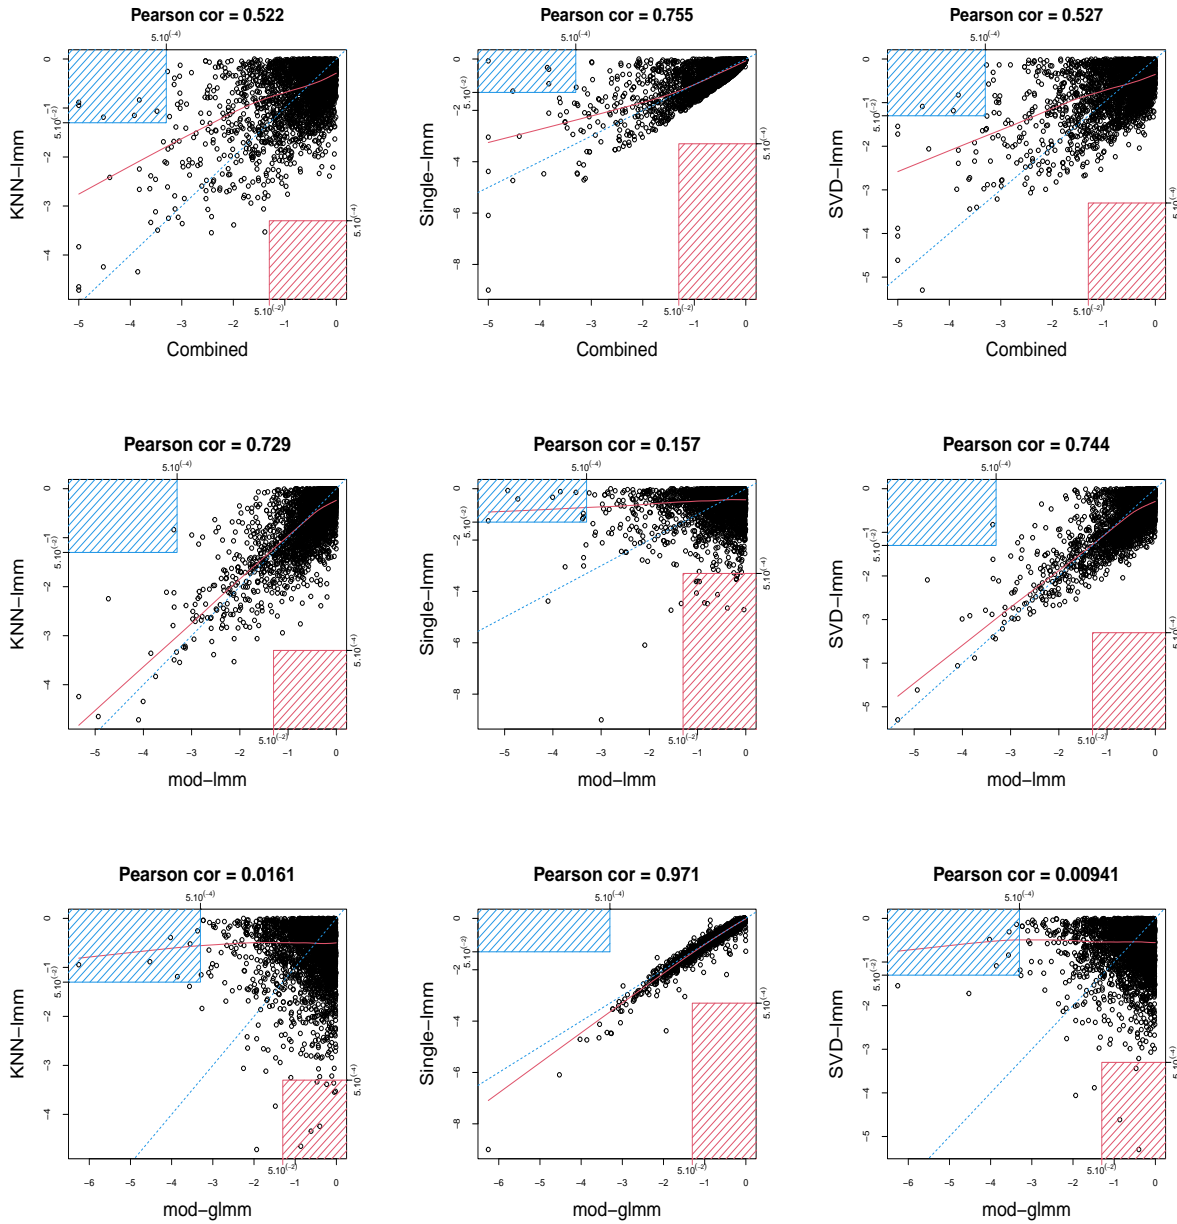

Figure S4: **Scatterplots between log<sub>10</sub>-transformed p-values of pairs of FSMs for *Proteocardis-ennv*.** Row 1: combined test and imputation-based FSMs. Row 2: Generalised mixed model (logistic) on missingness and imputation-based FSMs; proteins with less than 2 non-missing values are not displayed. Row 3: Linear mixed model on observed values and imputation-based FSMs. For each pair of testing procedure, the red rectangle corresponds to proteins with  $p > 5.10^{-2}$  with the first procedure and with  $p < 5.10^{-4}$  for the second procedure; conversely, the blue rectangle corresponds to proteins with  $p < 5.10^{-4}$  with the first procedure and with  $p > 5.10^{-2}$  for the second procedure.

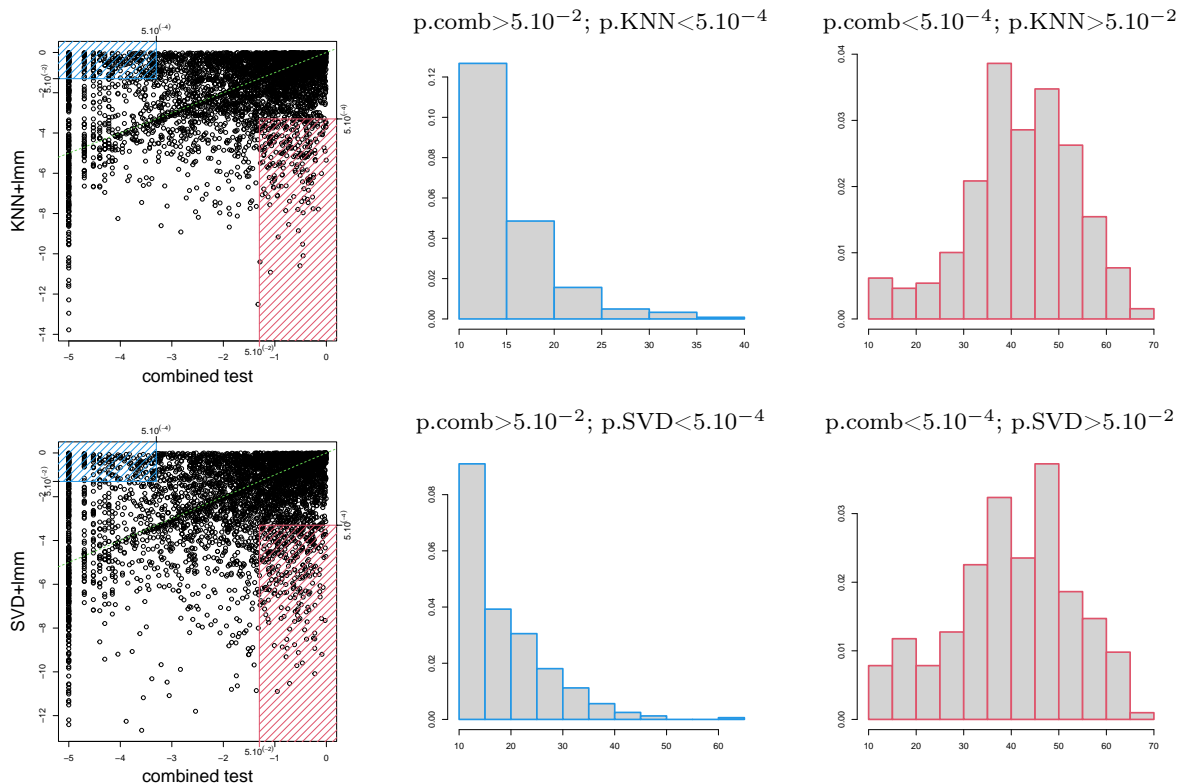

Figure S5: **Sparsity for proteins which are discordant** between the combined test and KNN-lmm (first row) or SVD-lmm (second row), on *Pigs*. Column 1: scatterplot of log10-transformed  $p$ -values of pairs of FSMs; the red rectangle corresponds to proteins with  $p > 5.10^{-2}$  with the first procedure and with  $p < 5.10^{-4}$  for the second procedure; conversely, the blue rectangle corresponds to proteins with  $p < 5.10^{-4}$  with the first procedure and with  $p > 5.10^{-2}$  for the second procedure. Column 2 (resp. 3): Histogram of the number of observed values by protein, for all proteins in the blue (resp. red) rectangle.

|            | Proteocardis-cyto |        |        | Proteocardis-env |        |        | Pigs   |        |         |
|------------|-------------------|--------|--------|------------------|--------|--------|--------|--------|---------|
|            | top30             | top100 | top200 | top30            | top100 | top200 | top200 | top500 | top1000 |
| Combined   | 0.60              | 0.69   | 0.69   | 0.63             | 0.68   | 0.76   | 0.17   | 0.17   | 0.25    |
| KNN-lmm    | 0.67              | 0.63   | 0.68   | 0.70             | 0.76   | 0.82   | 0.57   | 0.57   | 0.57    |
| SVD-lmm    | 0.70              | 0.65   | 0.69   | 0.67             | 0.74   | 0.80   | 0.28   | 0.31   | 0.34    |
| Single-lmm | 0.60              | 0.68   | 0.72   | 0.60             | 0.69   | 0.78   | 0.60   | 0.57   | 0.54    |

Table S1: **Proportion of selected variables with less than half observed intensities**, among the top N variables (between 20 and 50 non-missing values for *Proteocardis* data sets, and between 10 and 36 for *Pigs*).

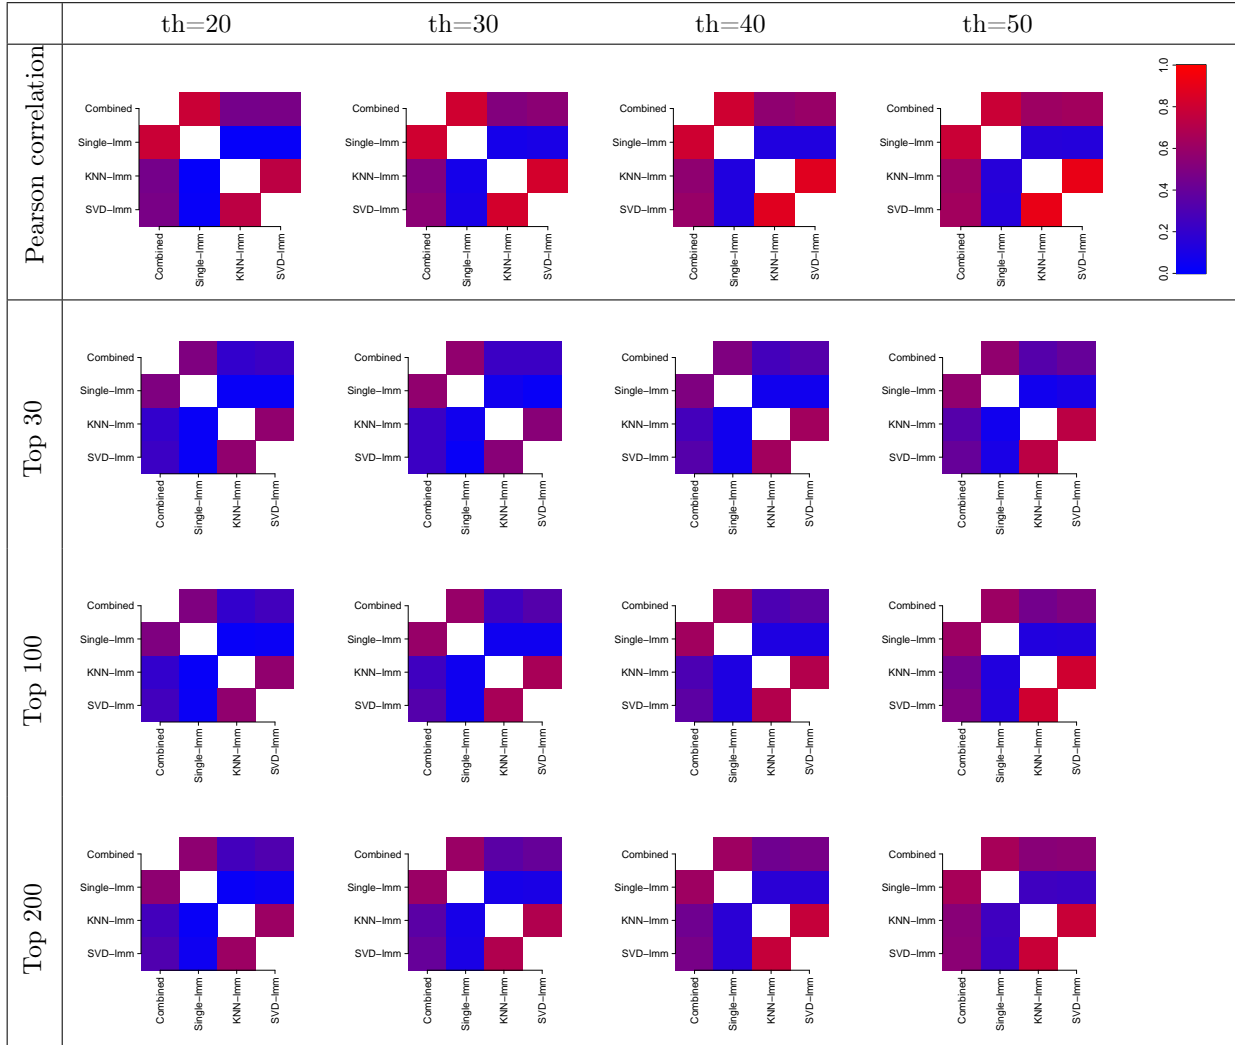

Figure S6: Pairwise agreement between  $p$ -values from the four FSMs, for filtering threshold of 20, 30, 40 and 50 for *Proteocardis-cyto*. Each row correspond to a criterion; row 1: Pearson correlation between log-transformed  $p$ -values; rows 2 to 4: proportion of common variables among the top  $N$  variables with  $N = 30, 100, 200$ . Each column correspond to a threshold value.



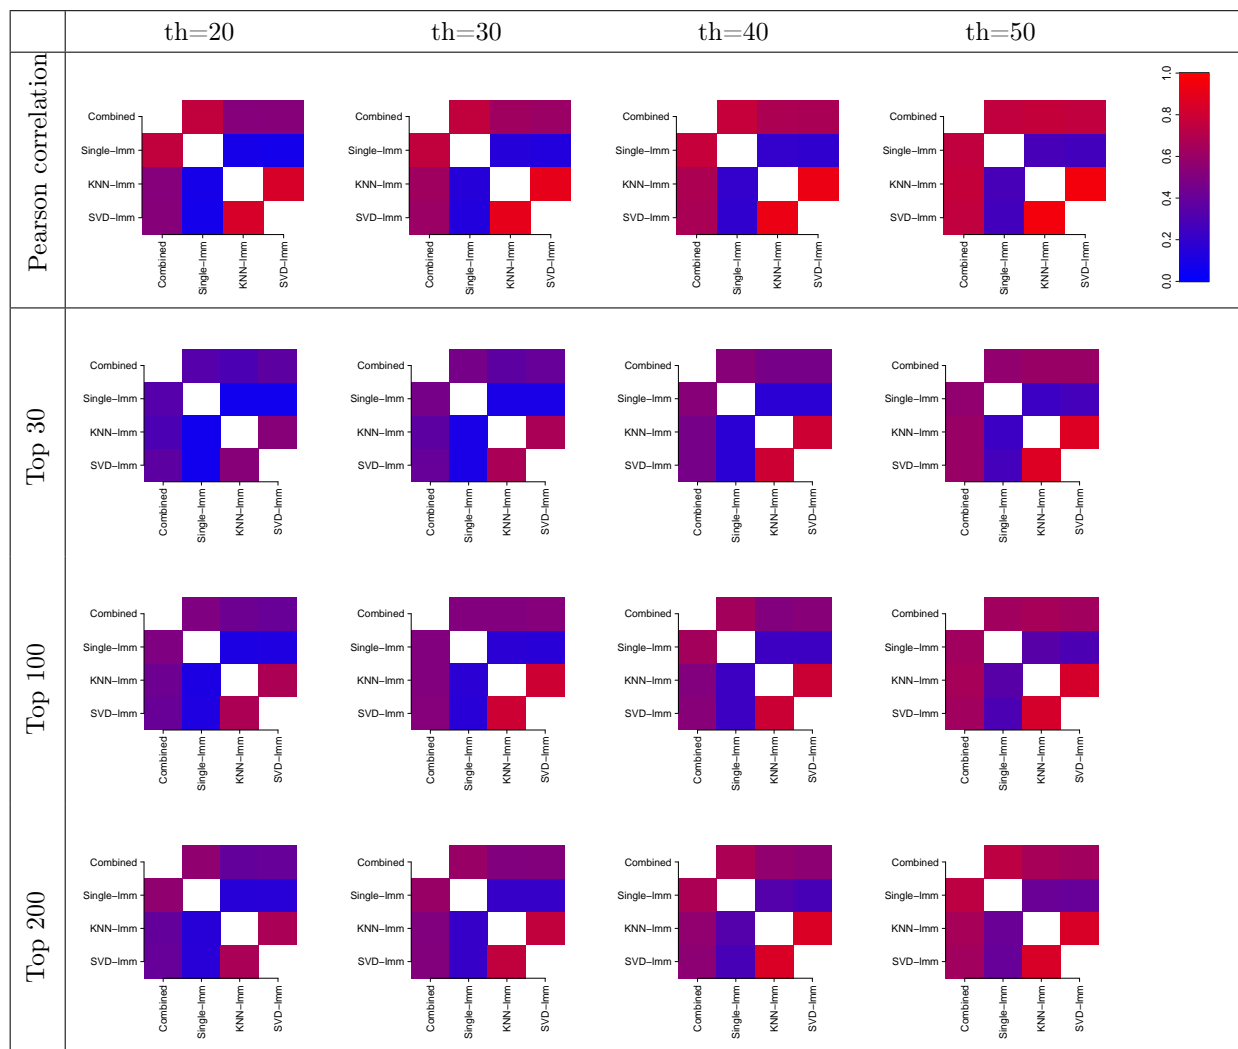

Figure S7: Pairwise agreement between  $p$ -values from the four FSMs, for filtering threshold of 20, 30, 40 and 50 for *Proteocardis-env*. Each row correspond to a criterion; row 1: Pearson correlation between log-transformed  $p$ -values; rows 2 to 4: proportion of common variables among the top  $N$  variables with  $N = 30, 100, 200$ . Each column correspond to a threshold value.

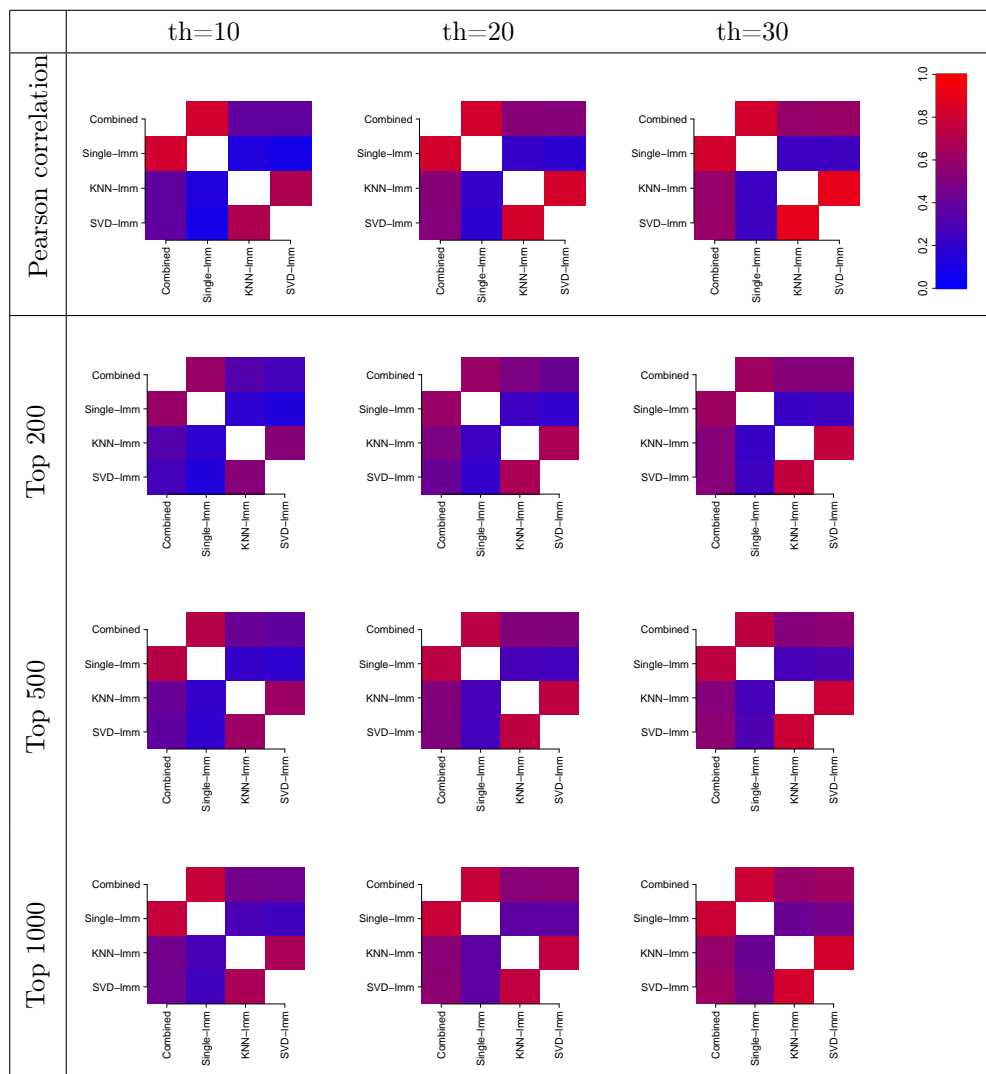

Figure S8: **Pairwise agreement between  $p$ -values from the four FSMs, for filtering threshold of 20 and 30 for  $Pigs$ .** Each row correspond to a criterion; row 1: Pearson correlation between log-transformed  $p$ -values; rows 2 to 4: proportion of common variables among the top  $N$  variables with  $N = 200, 500, 1000$ . Each column correspond to a threshold value.

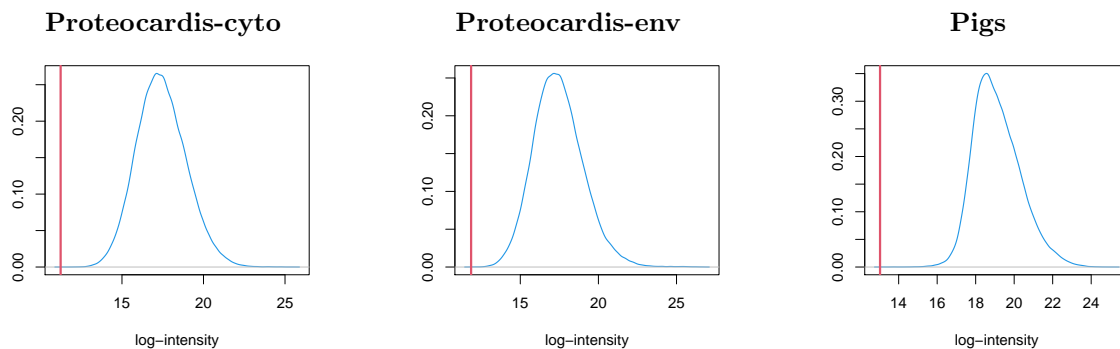

Figure S9: **Single value imputation.** Distribution of observed log-transformed intensities (blue) and imputed value (red) with single value imputation.

|         |     | FS combined test     | FS KNN-lmm   | FS SVD-lmm    | FS single-lmm | FS hurdle test       |
|---------|-----|----------------------|--------------|---------------|---------------|----------------------|
| Top 30  | RF  | <b>0.771</b> (0.021) | 0.758(0.025) | 0.719(0.017)  | 0.748(0.022)  | 0.767(0.017)         |
|         | SVM | 0.748(0.025)         | 0.616(0)     | 0.668(0.0032) | 0.734(0.0096) | <b>0.774</b> (0.013) |
| Top 100 | RF  | <b>0.769</b> (0.024) | 0.761(0.013) | 0.736(0.015)  | 0.741(0.017)  | 0.756(0.008)         |
|         | SVM | <b>0.772</b> (0.012) | 0.73(0.022)  | 0.707(0)      | 0.741(0.013)  | 0.708(0.0032)        |
| Top 200 | RF  | 0.738(0.015)         | 0.737(0.017) | 0.735(0.0093) | 0.733(0.013)  | <b>0.744</b> (0.015) |
|         | SVM | <b>0.744</b> (0.012) | 0.701(0.019) | 0.681(0.019)  | 0.699(0.0064) | 0.678(0.0032)        |

Table S2: **Prediction accuracy** for two classification procedures on *Proteocardis-env*. The selection of the top  $N$  variables ( $N = 30, 100, 200$ ) was followed by SVM or RF. Accuracy was computed in a 10-fold cross validation loop, repeated 10 times. Each cell provides the average accuracy (standard deviation of accuracy) computed over the 10 repetitions of the cross-validation. Bold numbers correspond to the highest accuracy among the four FSMs

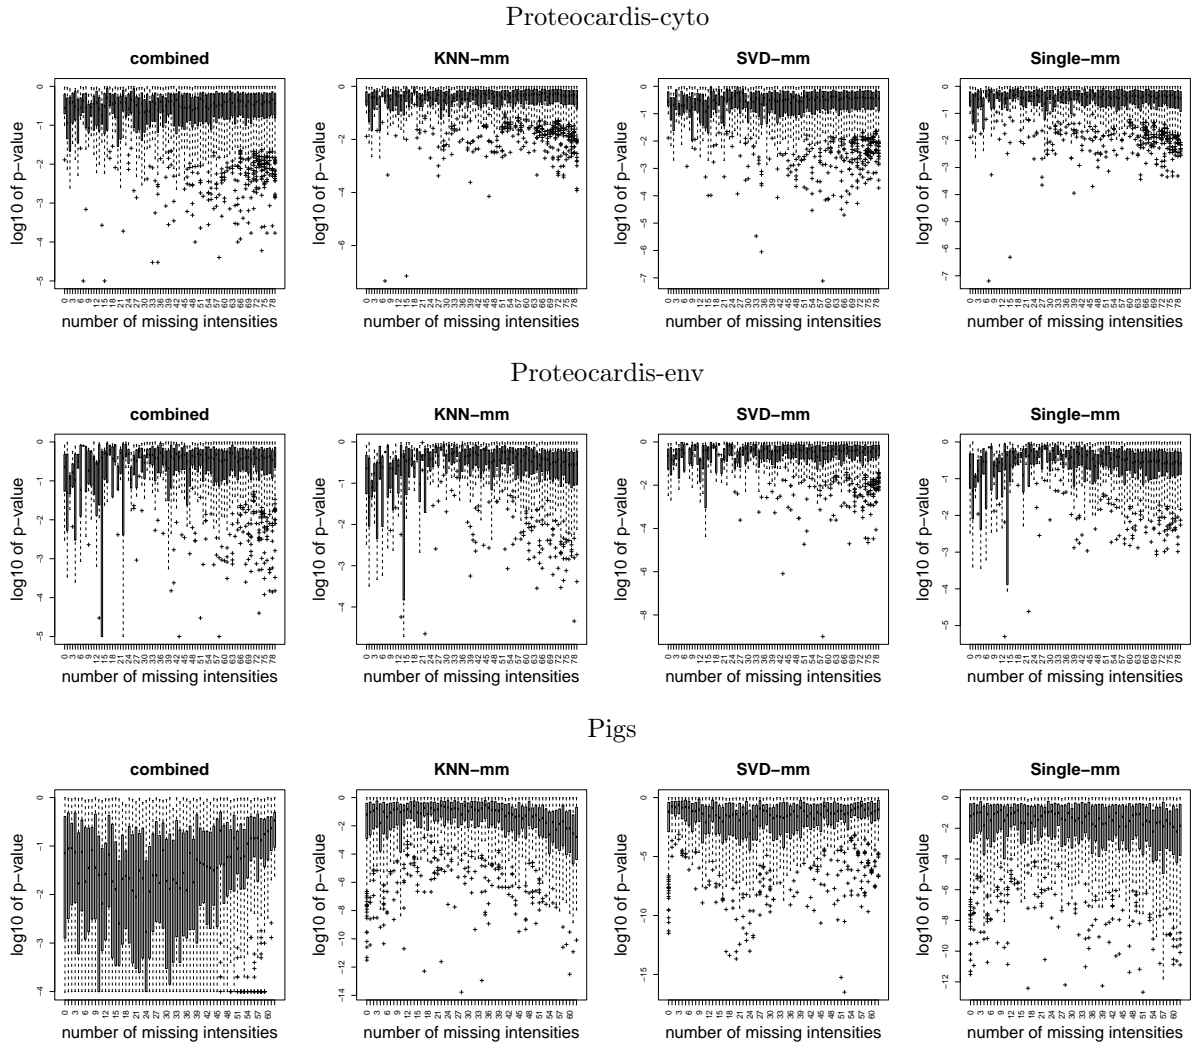

Figure S10: **Log10-transformed  $p$ -values as a function of sparsity.** The x-axis corresponds to the number of missing values among the 99 samples for *ProteoCardis* data sets, and among the 72 samples for *Pigs*.

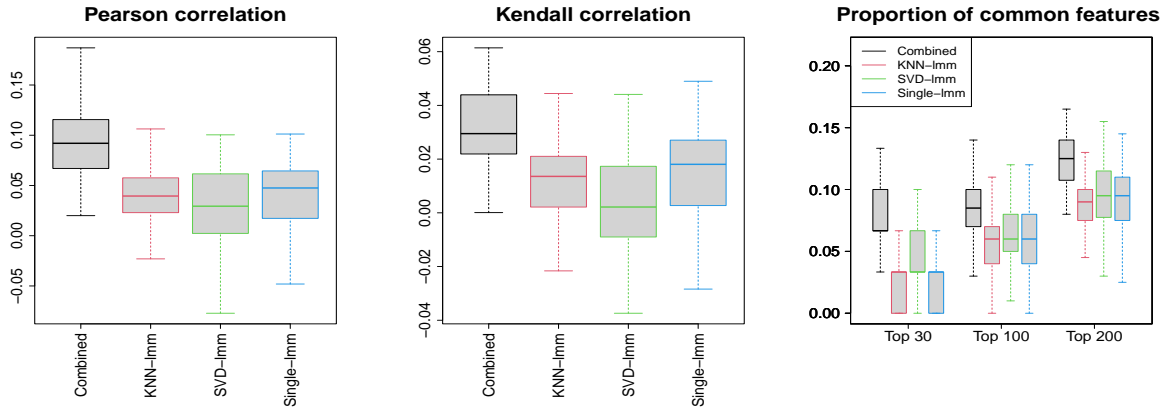

Figure S11: **Replicability of variable selection on independent subsets.** Pearson correlation between log-transformed  $p$ -values, Kendall correlation between  $p$ -values and proportion of common variables among the top  $N$  for 100 splitting of samples into two subsets. Dataset: *Proteocardis-env*.

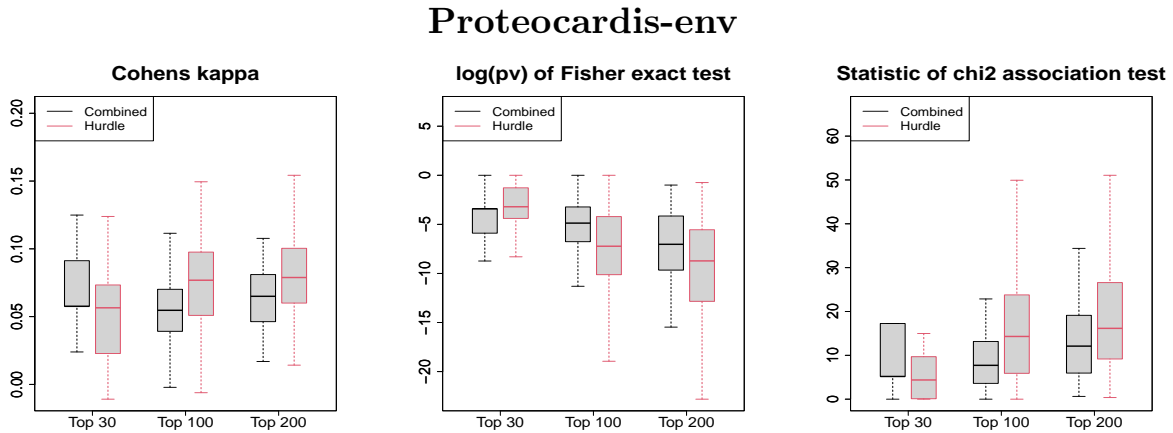

Figure S12: **Replicability of variable selection on independent subsets for the hurdle test and the combined test.** Boxplot of the Cohen's kappa (left), the log-transformed  $p$ -value of Fisher test (center) and the statistic of the  $\chi^2$  contingency table test (right), for selection of the top  $N$  features, performed on 100 splitting of the samples into two subsets. Black and red boxplots correspond to feature selection with the combined and the hurdle test respectively. Dataset: *ProteoCardis-env*

## References

- Benjamini, Y. and Hochberg, Y. (1995). Controlling the False Discovery Rate: A Practical and Powerful Approach to Multiple Testing. Journal of the Royal Statistical Society. Series B (Methodological), **57**(1), 289–300.
- Reiner, A., Yekutieli, D., and Benjamini, Y. (2003). Identifying differentially expressed genes using false discovery rate controlling procedures. Bioinformatics, **19**(3), 368–375.
